# Supplementary material for: Potential use of actigraphy to measure sleep in monkeys: comparison with behavioral analysis from videography
Source: PubMed Central journal article supplement — Zool Res. 2020 Jul 18;41(4):437–43. doi: 10.24272/j.issn.2095-8137.2020.056 (PMC7340525; doi:10.24272/j.issn.2095-8137.2020.056), 2020-07-18
Supplement: zr-41-4-437-S1.pdf [file zr-41-4-437-S1.pdf]

## **Supplementary Materials and Methods**

### **Animals**

Ten cynomolgus monkeys (*Macaca fascicularis*), aged 5–7 ( $5.800\pm 0.789$ ) years, were used in this study. The monkeys were singly housed (80 cm×80 cm×80 cm) in a controlled environment (temperature:  $22\pm 1$  °C; relative humidity:  $50\pm 5\%$ ) under a 12 h light/12 h dark cycle (lights off at 2000 h and on at 0800 h). The monkey facility is accredited by AAALAC International and all experimental protocols were approved in advance by the Institutional Animal Care and Use Committee of Yunnan Key Laboratory of Primate Biomedical Research (approval ID: LPBR201903003). All monkeys were given commercial monkey biscuits twice a day and fed with fruit and vegetables once daily. The animals were accommodated in their cages for at least one year prior to initial manipulation, and routine veterinary care was provided throughout the experiment to ensure good health by professional keepers and veterinarians.

### **Video recording**

Behaviors of the 10 cynomolgus monkeys were continuously video recorded for seven consecutive nights from 2000 h to 0800 h, using a focal follow technique (Altmann, 1974; Qin et al., 2013, 2015a, 2015b, 2015c, 2016, 2019a, 2019b). The video system consisted of 10 infrared video cameras and a hard disk video recorder. The monkeys were given three days to acquaint themselves with the video system prior to recording. One camera faced one cage, ensuring that the entire cage was visible. In total, 84 h of video recordings were collected for each monkey on separate nights sequentially throughout the seven-day period, and all video recordings were stored on a hard disk for subsequent sleep scoring.

### **Actigraphy monitoring**

Actical Physical Activity Monitors (Respironics, USA) were used for actigraphy monitoring of the 10 monkeys during their natural sleep period. The monitors are water resistant (IEC Standard 60529 IPX7), lightweight (16 g), and small (2.9 cm×3.7 cm×1.1 cm). They use a single internal omni-directional accelerometer that senses motion in all directions, integrates the amplitude and frequency of detected motion, and produces an electrical current varying in magnitude. Therefore, increased intensity of motion produces an increase in voltage. The Actical system stores the actigraphy data in the form of activity counts. Monkey identity, sex, age, and body weight and length, as well as the start date and time of monitoring, were entered into the Actical system (v3.1.0) before testing. The device was mounted on each monkey's neck with a soft belt and was located in the same position on each monkey to ensure the consistency of the obtained actigraphy data. The actigraphy data were collected at a sampling rate of 32 HZ and in epochs of 15 s (shortest available epoch with these monitors). Each monkey was given three days to acquaint itself with the monitor. Actigraphy monitoring started simultaneously as video recording and lasted for seven days. The actigraphy data were saved in 0.25 min intervals and each minute consisted of four consecutive activity counts. The dark (20:00–08:00 h) activity data were used to score sleep.

### **Sleep scoring**

The video recordings were scored by five raters independently, who were blind to

the experimental design. The five viewers analyzed each night of video recordings simultaneously using standardized behavioral classification, with an inter-rater correlation coefficient of  $>0.90$  obtained through SPSS statistical analysis. Three behavioral states, i.e., wake, transitional, and relaxed sleep, were scored in 1 min epochs (Noser et al., 2003; Qin et al., 2019b). States lasting  $<30$  s were not considered, whereas states lasting between 30 and 59 s were rounded to 1 min. The animals were considered to be awake when locomotion occurred, or when  $>3$  body or limb movements occurred within 1 min. Sleep was scored as transitional when 1–2 body or limb movements occurred within 1 min. Relaxed sleep was scored when the monkeys exhibited no body or limb movements. Sleep duration consisted of all 1 min epochs scored as transitional or relaxed sleep.

Dark activity data were used to score sleep with the same behavioral definitions as used in video analysis. As mentioned previously, the actigraphy data were recorded in 0.25 min intervals and each minute consisted of four consecutive activity counts. A monkey was scored as wake when 3–4 0.25 min activity counts were recorded in 1 min. Transitional sleep was scored when 1–2 0.25 min activity counts were recorded in 1 min. Relaxed sleep was scored when no activity counts were recorded within 1 min.

### **Data analysis**

Data analysis was conducted using SPSS software (SPSS Inc., USA). The normality of data was computed using the Kolmogorov-Smirnov test. Results demonstrated that all data were normally distributed ( $P>0.05$ ). The estimated values obtained by videography and actigraphy analyses, i.e., total amount of time spent in each of the three states (wake, transitional sleep, and relaxed sleep), were paired in all subjects to calculate Pearson correlation coefficients ( $r$ ). The value of  $r$  ranges from  $-1$  to  $1$ , which expresses the strength of the linear relationship between two variables ( $r$  close to  $1$  indicates a strong positive relationship;  $r$  of  $0$  indicates no relationship;  $r$  close to  $-1$  indicates strong negative relationship between the two variables). One-way analysis of variance (ANOVA) was used to analyze differences between the two methodologies. The alpha level was set at  $P=0.05$ , and all  $P$ -values were generated using two-sided tests. Data are presented as means $\pm$ SEM (standard error of the mean). To further analyze significant differences between sleep variables, Bland-Altman plots were constructed to examine the agreement between actigraphy and videography. Biases (defined as mean difference between actigraphy and videography sleep variables) for the lower and upper 95% confidence intervals (defined as mean difference $\pm$ 1.96 SD) are presented. A positive mean difference was indicative of overestimation and a negative mean difference was indicative of underestimation.

To further determine an exact percentage agreement between the actigraphy and videography methods, epoch-by-epoch analyses were carried out using PC-developed software based on the same number of 1 min epochs. Videographic analysis was considered as the reference methodology, with rows corresponding to videography and columns corresponding to actigraphy. Thus,  $2\times 2$  and  $3\times 3$  contingency tables were obtained, and each minute of each state ended up in one of the four or nine cells. Cells on the diagonal (upper left to lower right) indicated agreement between videography

and actigraphy techniques for each state. Other cells indicated the number of incorrectly scored epochs by actigraphy analysis. Moreover, a final table relating to all animals for all night-recordings was obtained by automatic completion. Data were expressed in percentages.

## SUPPLEMENTARY REFERENCES

- Altmann J. 1974. Observational study of behavior: sampling methods. *Behaviour*, **49**(3–4): 227–266.
- Noser R, Gygax L, Tobler I. 2003. Sleep and social status in captive gelada baboons (*Theropithecus gelada*). *Behavioural Brain Research*, **147**(1–2): 9–15.
- Qin DD, Dominic Rizak J, Feng XL, Chu XX, Yang SC, Li CL, Lv LB, Ma YY, Hu XT. 2013. Social rank and cortisol among female rhesus macaques (*macaca mulatta*). *Zoological Research*, **34**(E2): E42–E49.
- Qin DD, Chu XX, Feng XL, Li ZF, Yang SC, Lü LB, Yang Q, Pan L, Yin Y, Li JL, Xu L, Chen L, Hu XT. 2015a. The first observation of seasonal affective disorder symptoms in rhesus macaque. *Behavioural Brain Research*, **292**: 463–469.
- Qin DD, Rizak J, Chu XX, Li ZF, Yang SC, Lü LB, Yang LC, Yang Q, Yang B, Pan L, Yin Y, Chen L, Feng XL, Hu XT. 2015b. A spontaneous depressive pattern in adult female rhesus macaques. *Scientific Reports*, **5**: 11267.
- Qin DD, Rizak J, Feng XL, Yang SC, Yang LC, Fan XN, Lü LB, Chen L, Hu XT. 2015c. Cortisol responses to chronic stress in adult macaques: moderation by a polymorphism in the serotonin transporter gene. *Behavioural Brain Research*, **278**: 280–285.
- Qin DD, Rizak J, Feng XL, Yang SC, Lü LB, Pan L, Yin Y, Hu XT. 2016. Prolonged secretion of cortisol as a possible mechanism underlying stress and depressive behaviour. *Scientific Reports*, **6**: 30187.
- Qin DD, Li ZF, Li ZX, Wang LM, Hu ZF, Lü LB, Wang ZB, Liu Y, Yin Y, Li ZF, Hu XT. 2019a. Chronic glucocorticoid exposure induces depression-like phenotype in rhesus macaque (*macaca mulatta*). *Frontiers in Neuroscience*, **13**: 188.
- Qin DD, Wu SH, Chen YC, Hu XT. 2019b. Behavioral screening tools for identifying autism in macaques: existing and promising tests. *Brain Research Bulletin*, **146**: 87–93.

## Supplementary Tables

### Supplementary Table S1 Durations of states of sleep based on videography and actigraphy analyses

| Monkey    | Wake*       |            | Transitional sleep* |            | Relaxed sleep* |            |
|-----------|-------------|------------|---------------------|------------|----------------|------------|
|           | Videography | Actigraphy | Videography         | Actigraphy | Videography    | Actigraphy |
| Monkey 1  | 818         | 46         | 1 431               | 244        | 2 791          | 4 750      |
| Monkey 2  | 851         | 84         | 1 220               | 264        | 2 969          | 4 692      |
| Monkey 3  | 1 197       | 48         | 1 470               | 586        | 2 373          | 4 406      |
| Monkey 4  | 1 223       | 261        | 1 250               | 693        | 2 567          | 4 086      |
| Monkey 5  | 787         | 114        | 1 107               | 529        | 3 146          | 4 397      |
| Monkey 6  | 823         | 37         | 1 116               | 292        | 3 101          | 4 711      |
| Monkey 7  | 804         | 145        | 1 283               | 660        | 2 953          | 4 235      |
| Monkey 8  | 921         | 180        | 1 612               | 486        | 2 507          | 4 374      |
| Monkey 9  | 1 222       | 82         | 1 810               | 524        | 2 008          | 4 434      |
| Monkey 10 | 1 263       | 167        | 1 661               | 423        | 2 116          | 4 450      |

Values are presented in minutes. \*: Significance level of inter-methodological differences for three states during dark periods,  $P < 0.05$ .

### Supplementary Table S2 Epoch-by-epoch analysis for wake and sleep showing total duration (min) and corresponding percentage (%) of epochs scored in agreement (diagonal from left to right) between videography (rows) and actigraphy (columns) methods and those scored differently by actigraphy analysis

| State | min   |        | %      |        |
|-------|-------|--------|--------|--------|
|       | Wake  | Sleep  | Wake   | Sleep  |
| Wake  | 1 104 | 8 805  | 11.141 | 88.859 |
| Sleep | 60    | 40 431 | 0.148  | 99.852 |
